# Supplementary figures and images for: DNA Methylation‐Based Epigenetic Repression of SLC22A4 Promotes Resistance to Cytarabine in Acute Myeloid Leukemia
Source: PubMed Central journal article supplement — Clin Transl Sci. 2020 Sep 9;14(1):137–42. doi: 10.1111/cts.12861 (PMC7877866; doi:10.1111/cts.12861), 2020-09-09

**Figure S1. Characterization of Ara-C uptake in AML cell lines.**

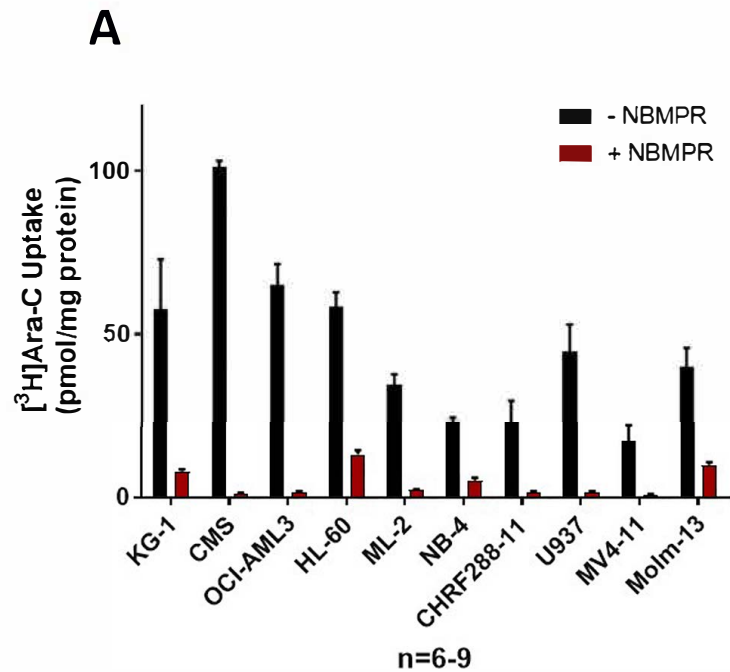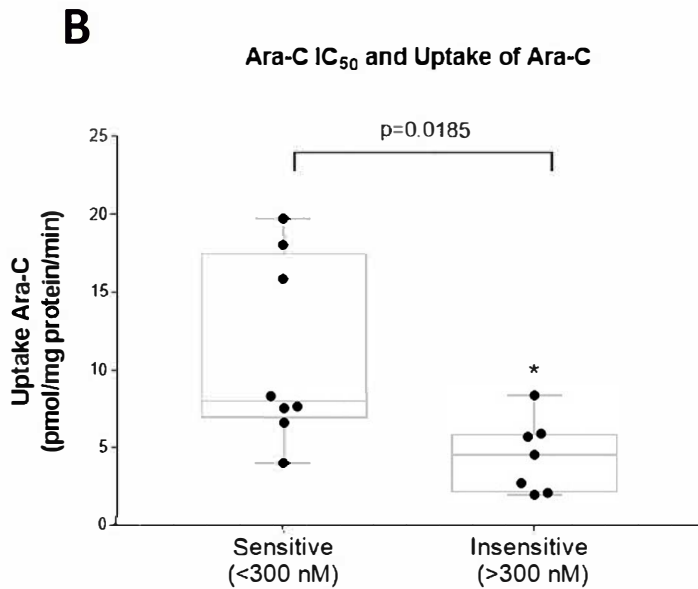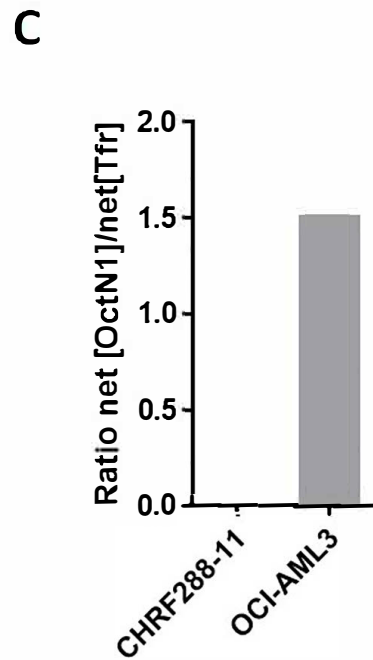

Supplement: CTS-14-137-s002.pdf [file CTS-14-137-s002.pdf]

**Figure S2. Methylation within OCTN1 promoter region represses downstream transcription.**

**A**

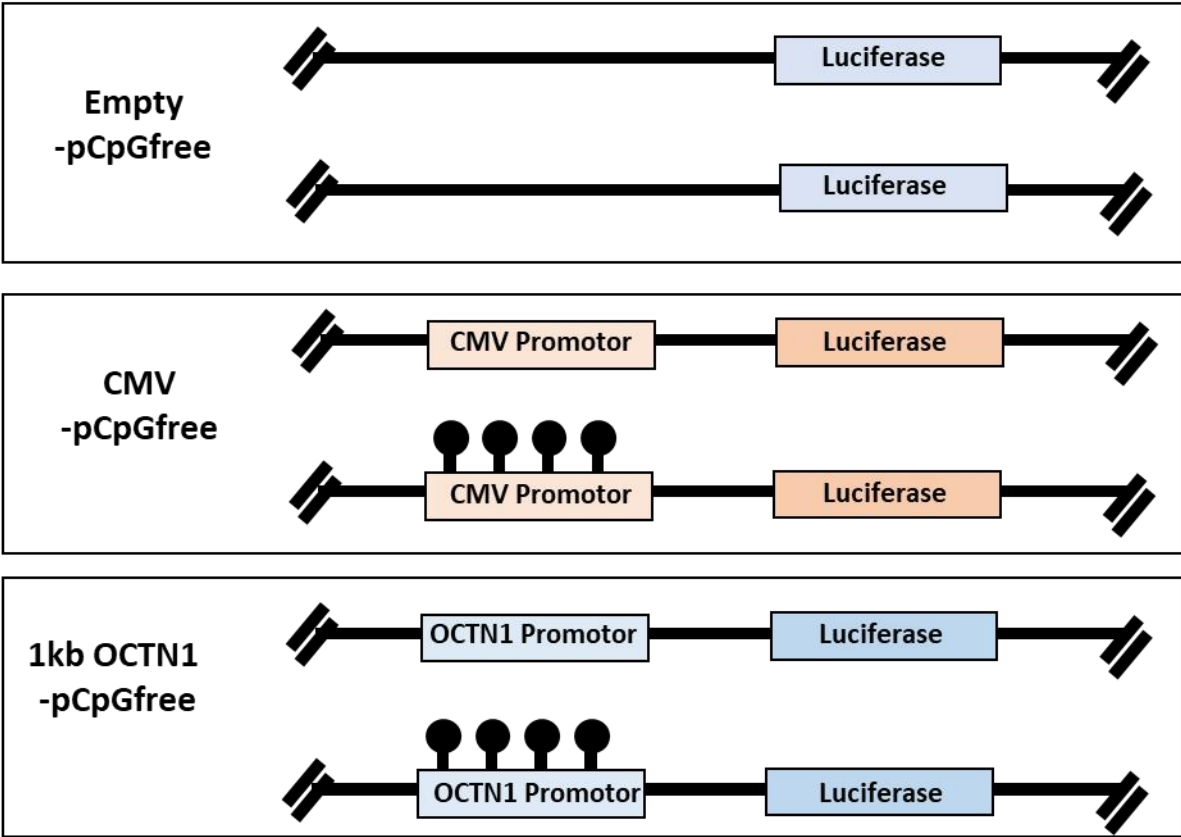

**B**

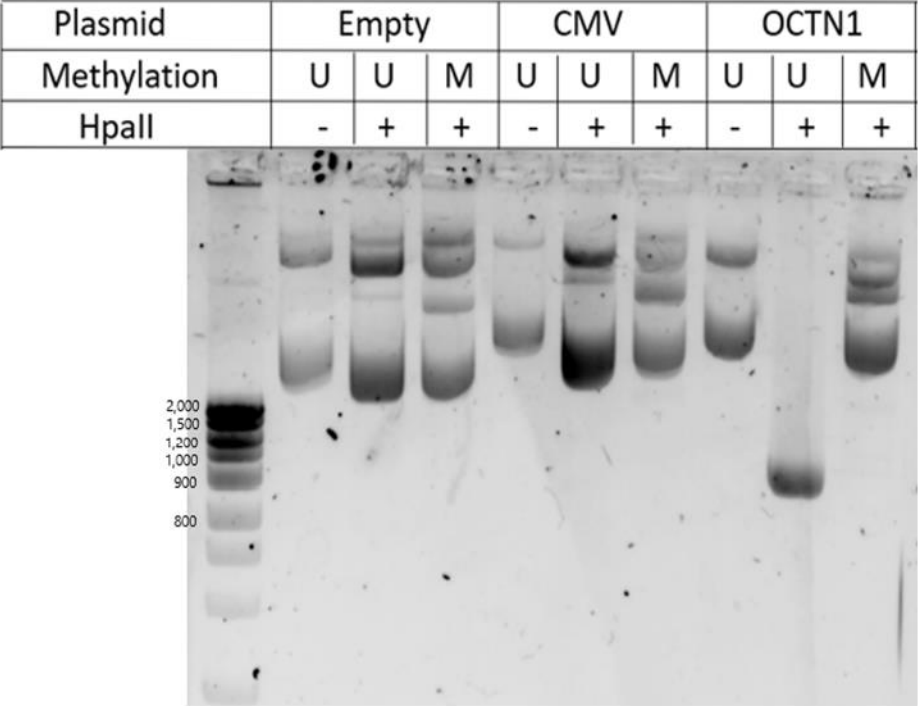

Supplement: CTS-14-137-s003.pdf [file CTS-14-137-s003.pdf]

**Figure S3. Methylation correlation of OCTN1/SLC22A4 on expression, cytogenetics and outcome.**

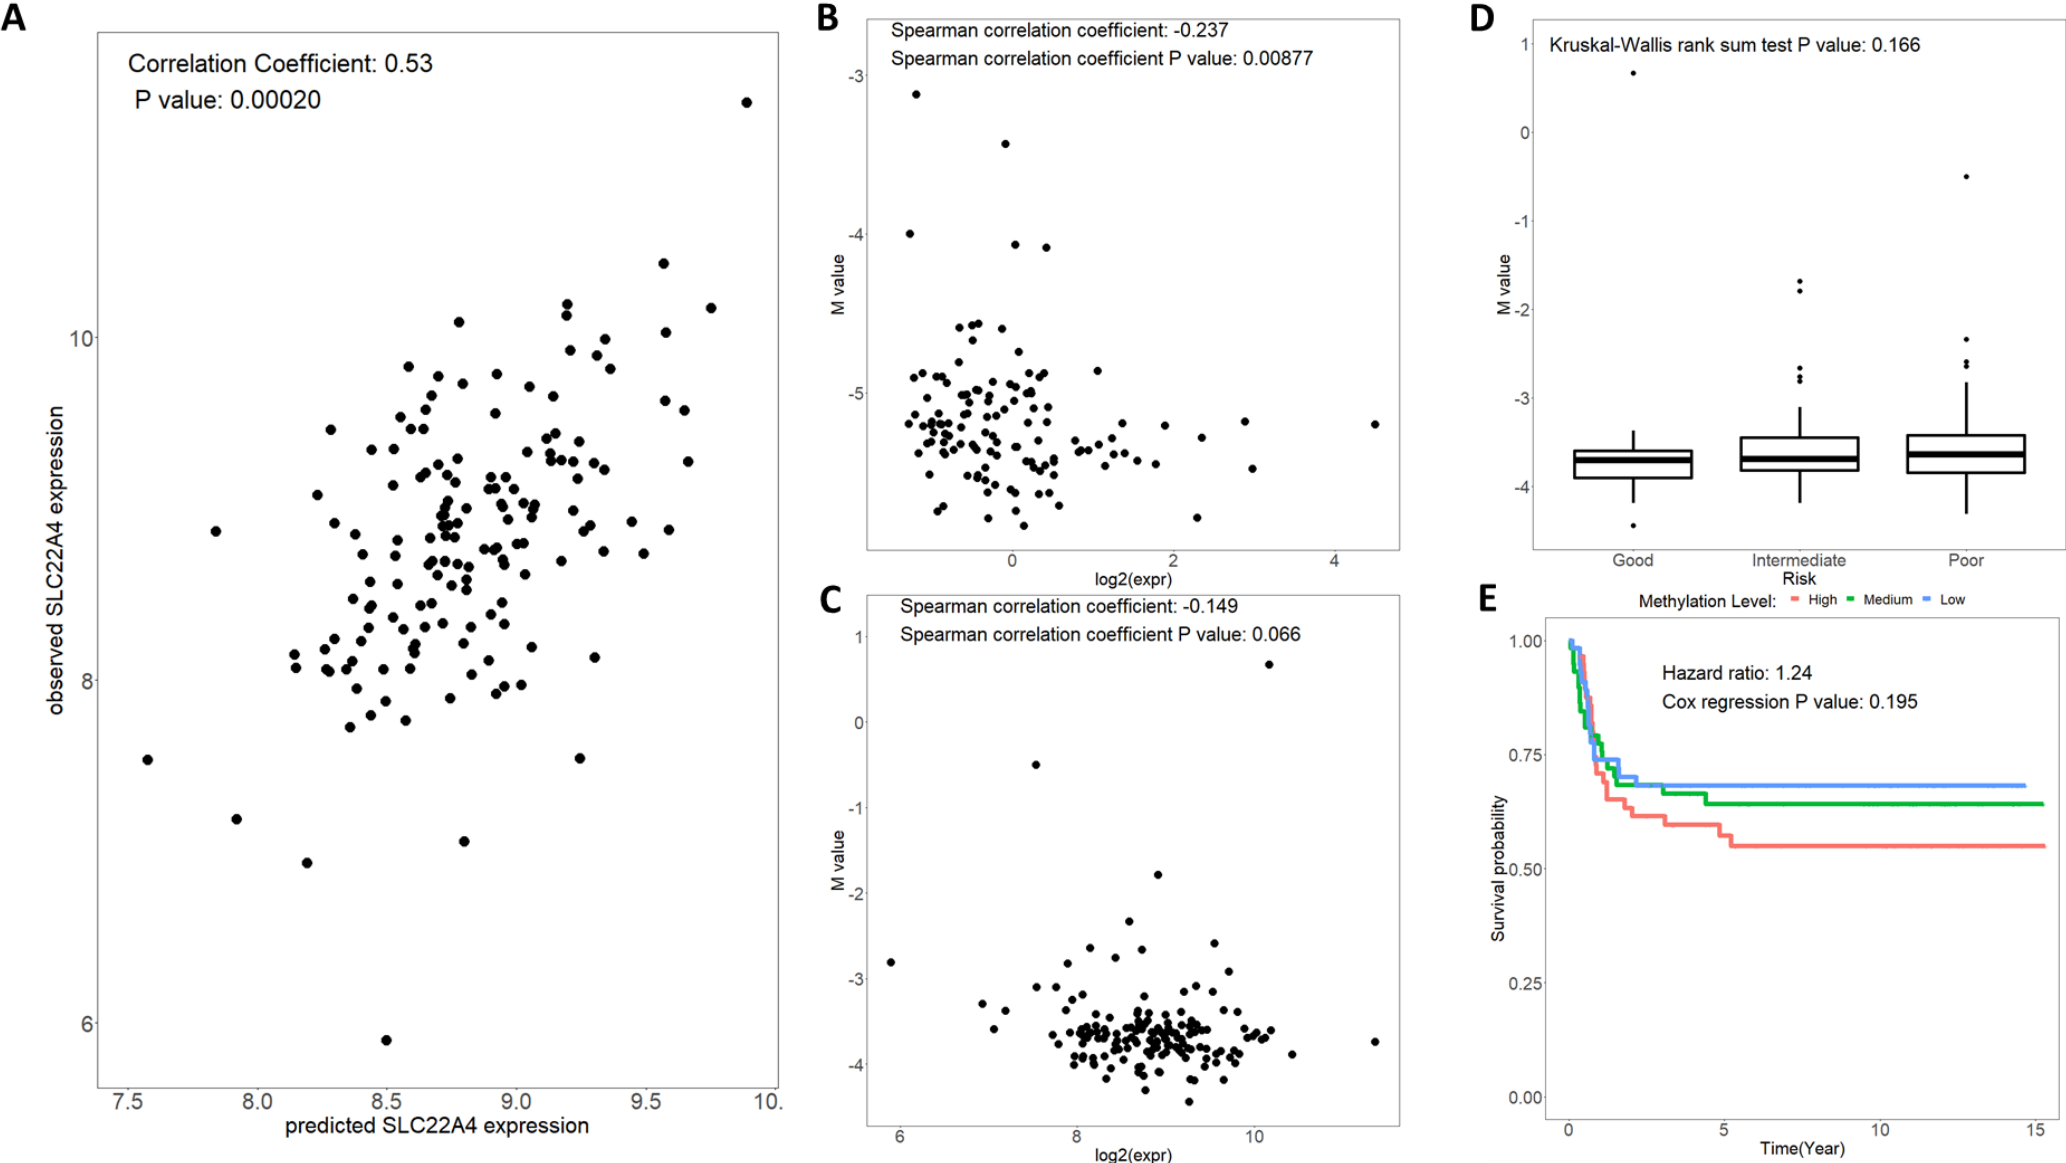

Supplement: CTS-14-137-s004.pdf [file CTS-14-137-s004.pdf]
